# Supplementary material for: Flower-like Bi4O5I2/Bi5O7I nanocomposite: facile hydrothermal synthesis and efficient photocatalytic degradation of propylparaben under visible-light irradiation
Source: Royal Society of Chemistry journal article supplement (doi:10.1039/c6ra03988j), 2016-01-01
Supplement: c6ra03988j1.pdf [file c6ra03988j1.pdf]

## **Supplementary Information**

### **Flower-like Bi<sub>4</sub>O<sub>5</sub>I<sub>2</sub>/Bi<sub>5</sub>O<sub>7</sub>I nanocomposite: facile hydrothermal synthesis and efficient photocatalytic degradation of propylparaben under visible-light irradiation**

Shunheng Tu, Mingli Lu, Xin Xiao\*, Chunxia Zheng, Huan Zhong, Xiaoxi Zuo, Junmin Nan\*

School of Chemistry and Environment, South China Normal University; Guangzhou Key Laboratory of Materials for Energy Conversion and Storage, Guangzhou 510006, PR China

Corresponding author: Xin Xiao

Tel.: +86-20-39310255

Fax: +86-20-39310187

E-mail: [xiaox@scnu.edu.cn](mailto:xiaox@scnu.edu.cn) (X. Xiao)

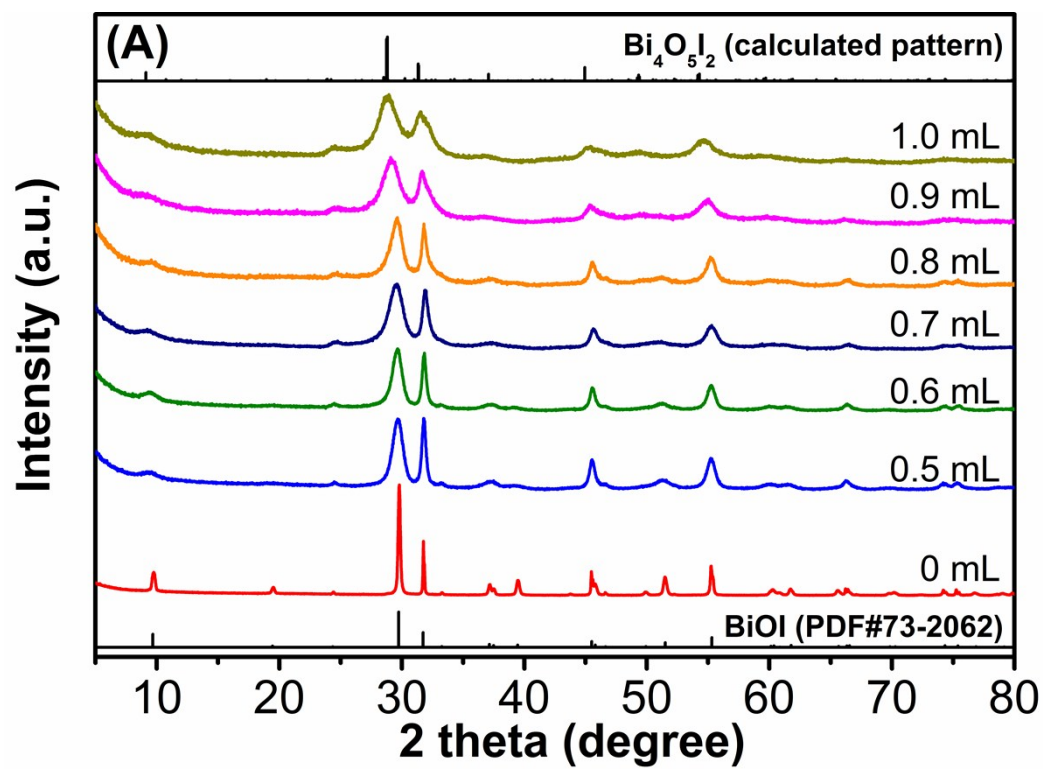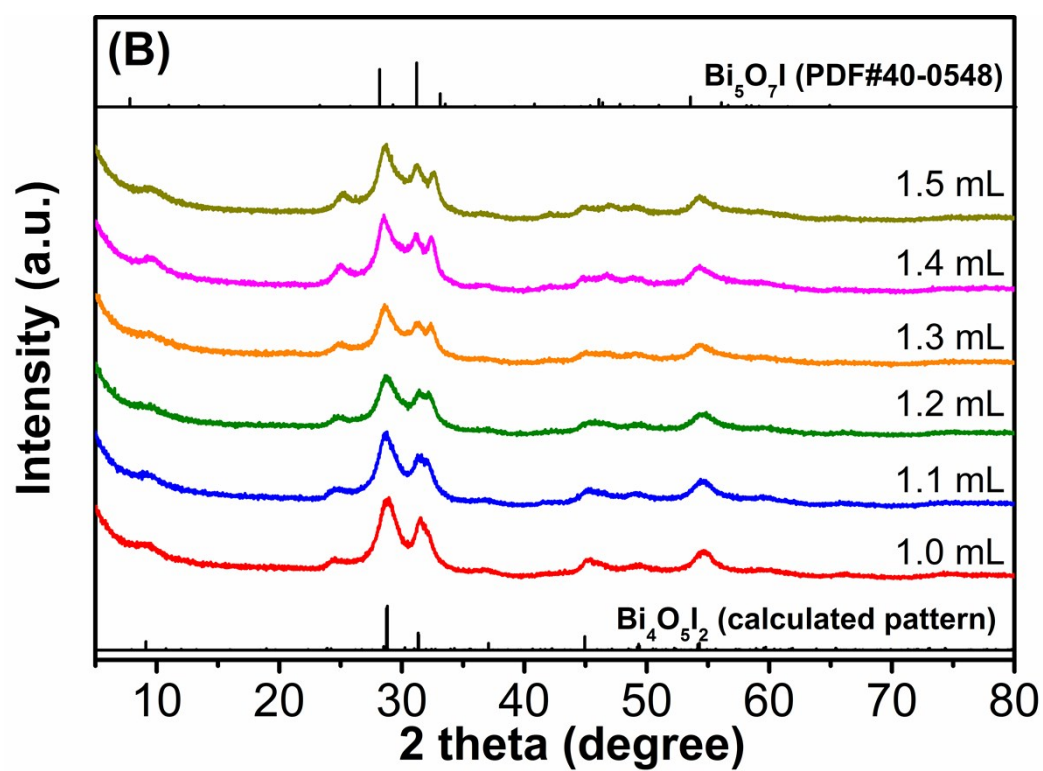

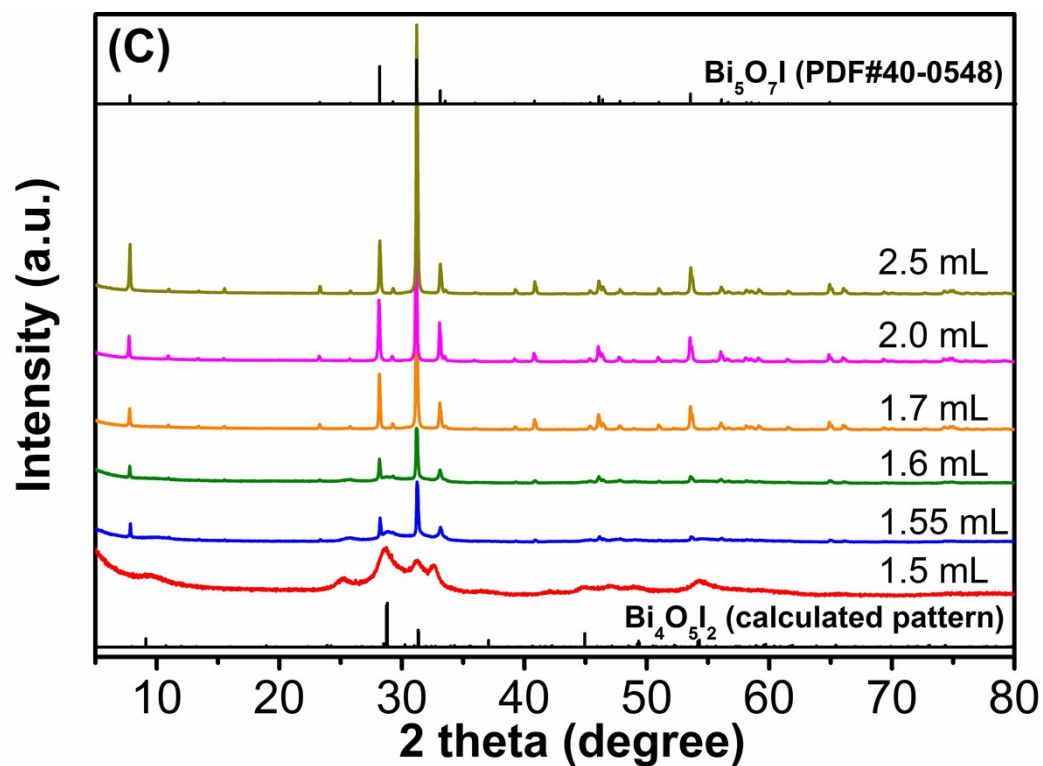

Fig. S1. XRD patterns of samples prepared by adding different amount of NaOH.

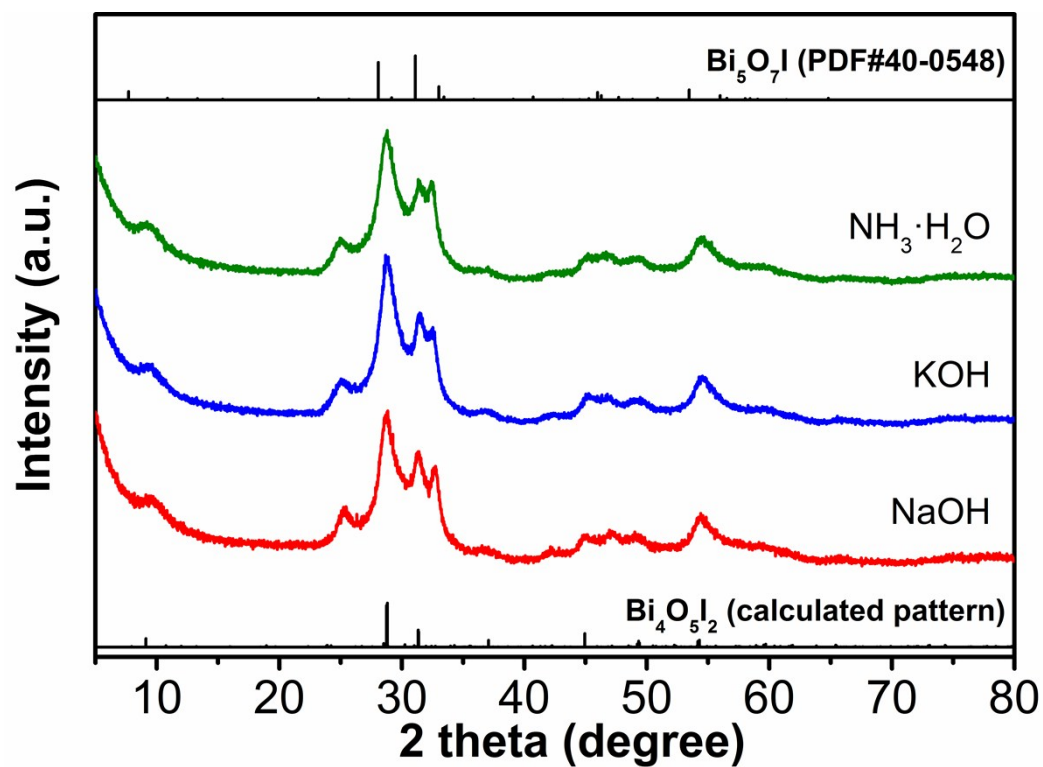

Fig. S2. XRD patterns of samples prepared by adding different kinds of base.

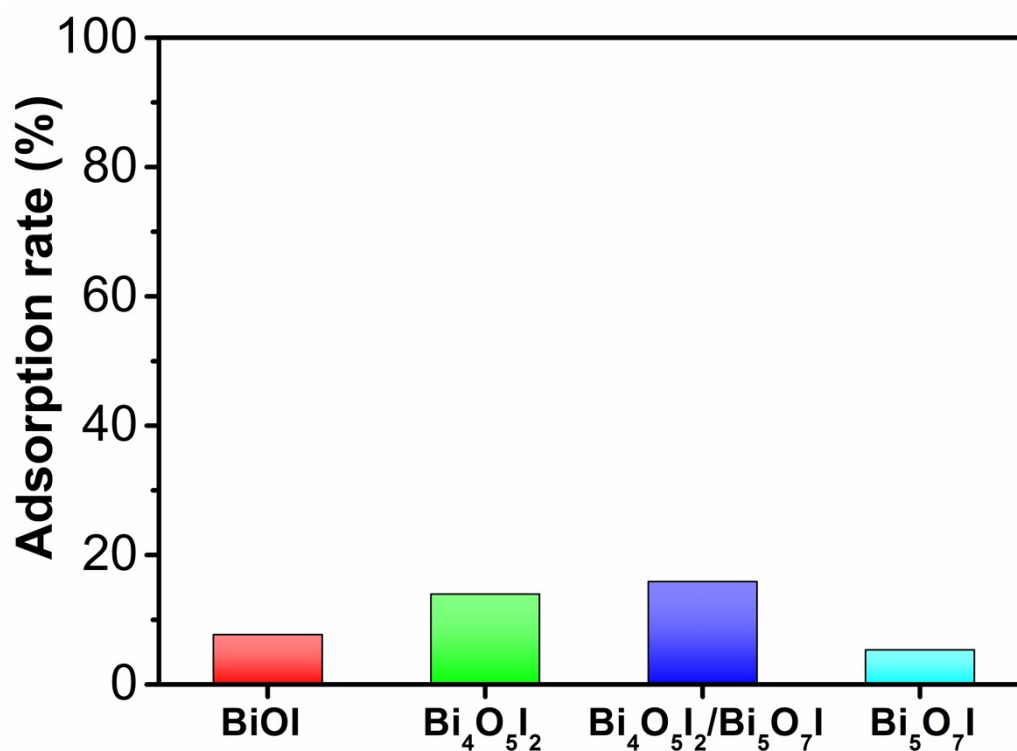

Fig. S3. Adsorption efficiencies of PPB over four photocatalysts after 90 min in dark.

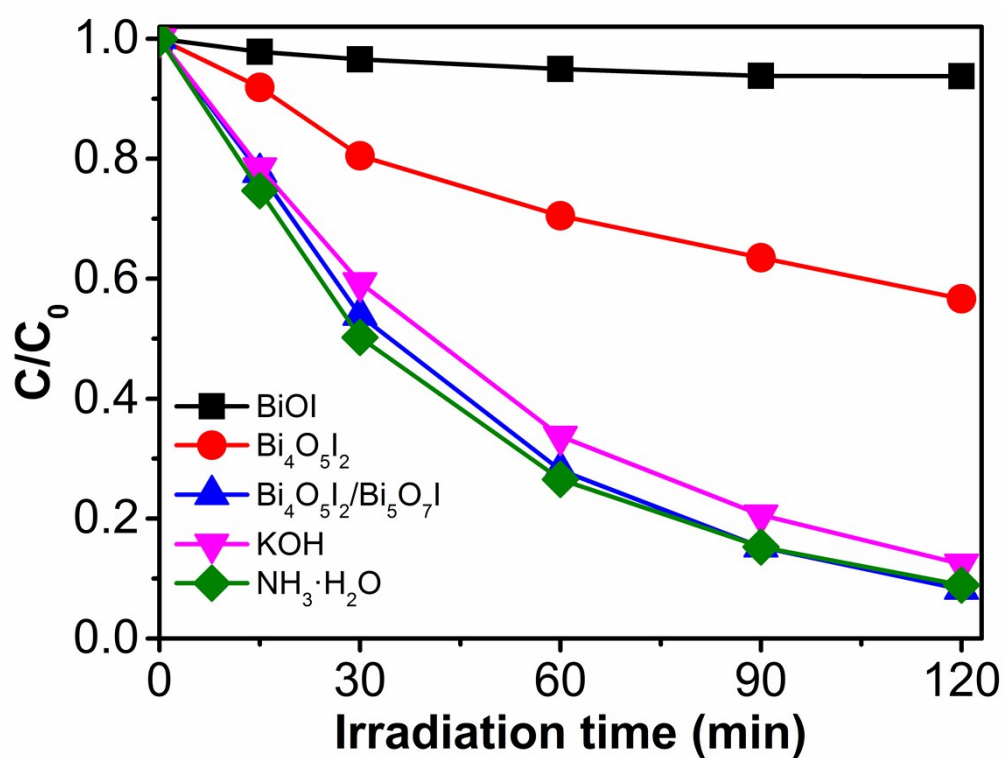

Fig. S4 Photocatalytic degradation of PPB over the BiOI,  $\text{Bi}_4\text{O}_5\text{I}_2$ , and three  $\text{Bi}_4\text{O}_5\text{I}_2/\text{Bi}_5\text{O}_7\text{I}$  prepared by using different base under visible-light irradiation.

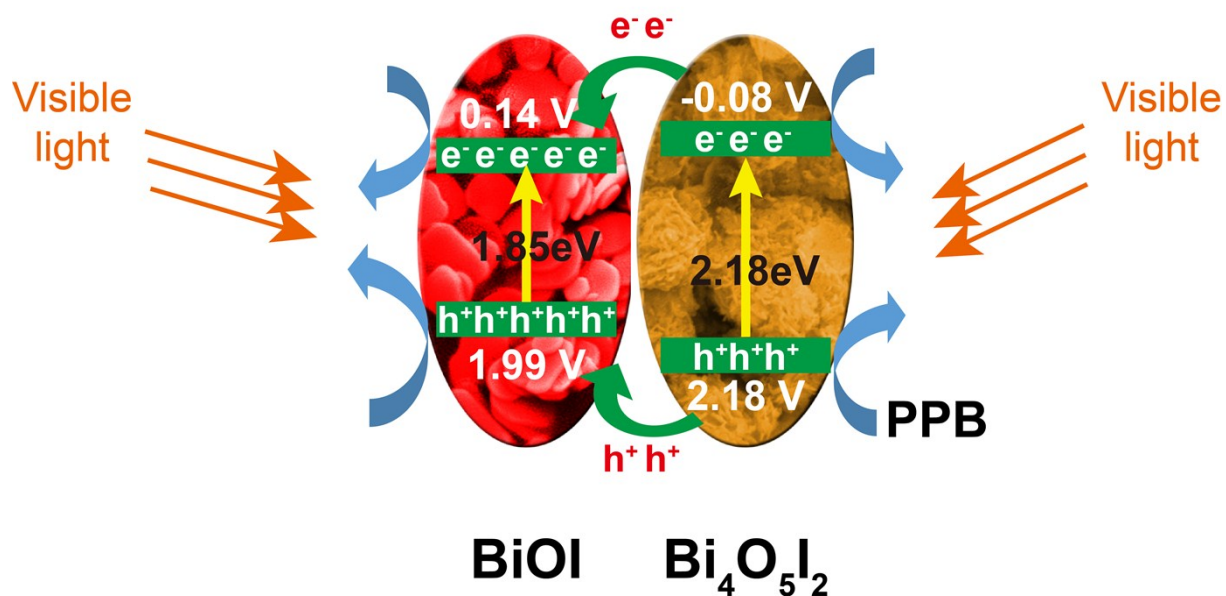

Fig. S5. The band structure of  $Bi_4O_5I_2/BiOI$  heterojunction.

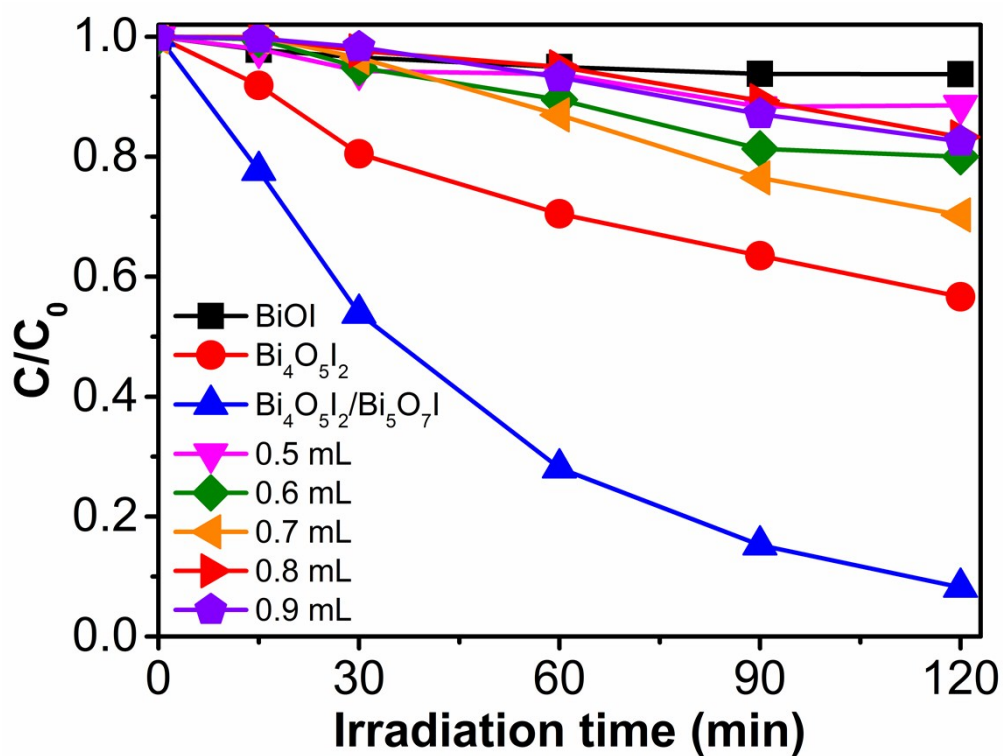

Fig. S6 Photocatalytic degradation of PPB over the BiOI,  $Bi_4O_5I_2$ ,  $Bi_4O_5I_2/Bi_5O_7I$ , and  $Bi_4O_5I_2/BiOI$  heterojunctions.

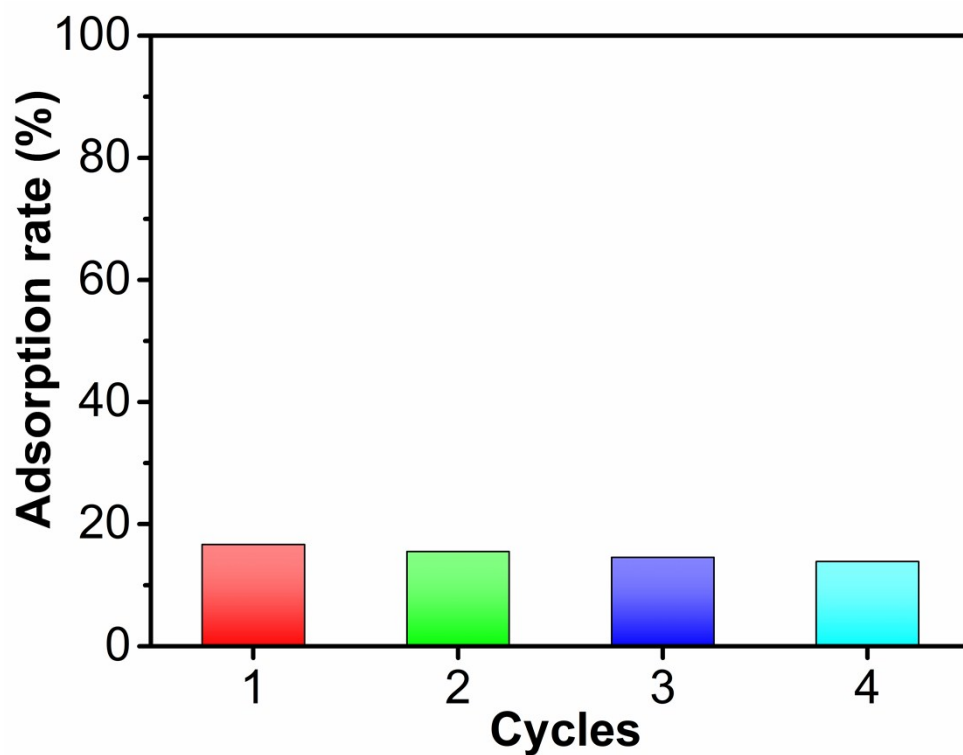

Fig. S7. Adsorption efficiencies of PPB on  $\text{Bi}_4\text{O}_5\text{I}_2/\text{Bi}_5\text{O}_7\text{I}$  catalyst in dark during cycle experiments.

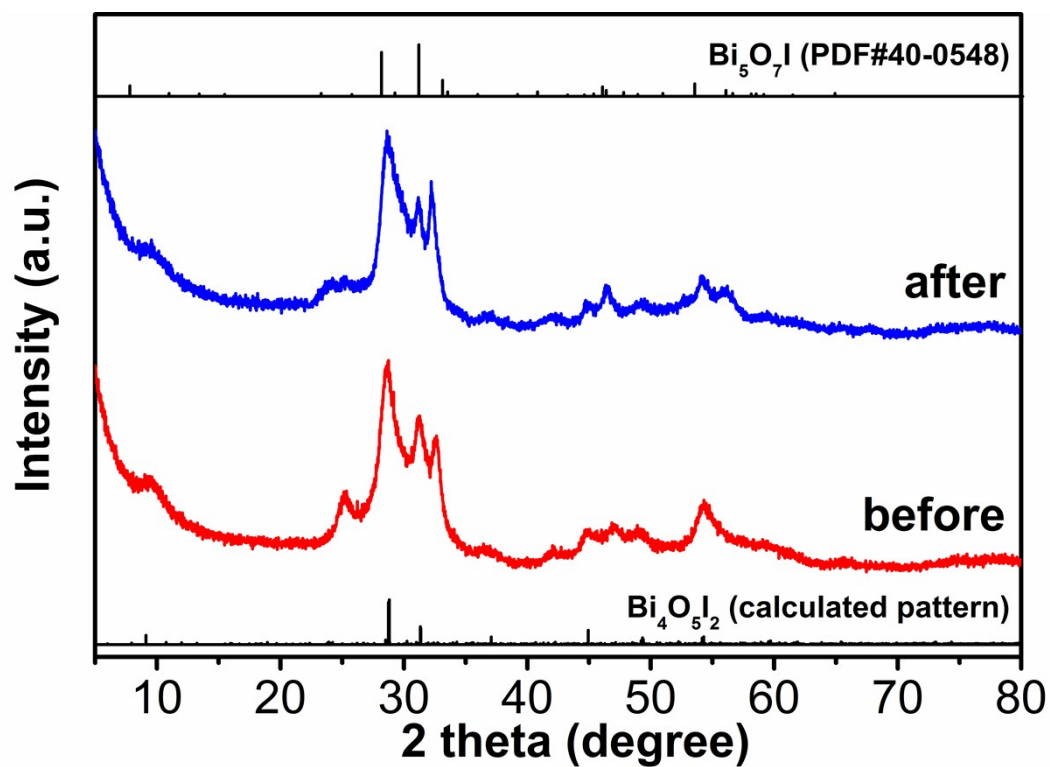

Fig. S8. XRD patterns of as-prepared  $\text{Bi}_4\text{O}_5\text{I}_2/\text{Bi}_5\text{O}_7\text{I}$  before and after photocatalytic reaction.
